# Supplementary material
Source: PubMed Central journal article supplement (PMC4793430)
Supplement: reyr012069.ww1_default.pdf [file reyr012069.ww1_default.pdf]

## Appendix

**Supplementary table A Hazard Ratios and 95% Confidence Intervals for cardiovascular events in offspring with adult socioeconomic status data<sup>†</sup> according to maternal BMI category [posted as supplied by author]**

| Offspring outcomes                   | Maternal BMI | * <sup>a</sup> Adj HR (95% CI) | * <sup>b</sup> Adj HR (95% CI) |
|--------------------------------------|--------------|--------------------------------|--------------------------------|
| <b>All CV events combined</b>        |              |                                |                                |
|                                      | underweight  | 0.75 (0.54, 1.03)              | 0.72 (0.51, 1.02)              |
|                                      | normal       | 1                              | 1                              |
|                                      | overweight   | 1.15 (0.99, 1.32)              | 1.16 (0.98, 1.38)              |
|                                      | obese        | 1.21 (0.92, 1.61)              | 1.22 (0.82, 1.81)              |
| <b>Angina</b>                        |              |                                |                                |
|                                      | underweight  | 0.30 (0.07, 1.23)              | 0.32 (0.08, 1.32)              |
|                                      | normal       | 1                              | 1                              |
|                                      | overweight   | 1.07 (0.72, 1.60)              | 0.75 (0.42, 1.34)              |
|                                      | obese        | 1.63 (0.78, 3.41)              | 1.64 (0.58, 4.63)              |
| <b>Myocardial infarction</b>         |              |                                |                                |
|                                      | underweight  | 0.50 (0.18, 1.36)              | 0.40 (0.13, 1.26)              |
|                                      | normal       | 1                              | 1                              |
|                                      | overweight   | 1.19 (0.84, 1.68)              | 1.19 (0.75, 1.87)              |
|                                      | obese        | 1.07 (0.51, 2.24)              | 0.70 (0.18, 2.82)              |
| <b>Stroke</b>                        |              |                                |                                |
|                                      | underweight  | 1.18 (0.43, 3.28)              | 1.30 (0.47, 3.65)              |
|                                      | normal       | 1                              | 1                              |
|                                      | overweight   | 1.68 (1.05, 2.69)              | 1.82 (0.98, 3.37)              |
|                                      | obese        | 0.76 (0.18, 3.24)              | 0.95 (0.13, 7.08)              |
| <b>Other cerebrovascular disease</b> |              |                                |                                |
|                                      | underweight  | 0.33 (0.05, 2.41)              | 0.39 (0.05, 2.83)              |
|                                      | normal       | 1                              | 1                              |
|                                      | overweight   | 1.92 (1.20, 3.07)              | 2.25 (1.25, 4.07)              |
|                                      | obese        | 1.03 (0.30, 3.51)              | 1.88 (0.44, 8.06)              |
| <b>Peripheral arterial disease</b>   |              |                                |                                |
|                                      | underweight  | 0.22 (0.03, 1.60)              | 0.25 (0.03, 1.78)              |
|                                      | normal       | 1                              | 1                              |
|                                      | overweight   | 1.68 (1.14, 2.48)              | 1.83 (1.11, 3.04)              |
|                                      | obese        | 1.54 (0.65, 3.62)              | 1.77 (0.55, 5.63)              |
| <b>Other cardiovascular disease</b>  |              |                                |                                |
|                                      | underweight  | 0.80 (0.56, 1.14)              | 0.75 (0.51, 1.11)              |
|                                      | normal       | 1                              | 1                              |
|                                      | overweight   | 1.09 (0.93, 1.27)              | 1.09 (0.89, 1.33)              |
|                                      | obese        | 1.20 (0.87, 1.66)              | 1.27 (0.82, 1.98)              |

<sup>†</sup>adult socioeconomic status data only recorded in individuals born 1950-1955 (n=13,718)

\*adjusted for adult socioeconomic status, gestational age, gender of the baby and birth weight, gestation weight measured and mother's age at delivery.

<sup>a</sup> all offspring, <sup>b</sup>offspring of mothers with BMI measured in early pregnancy
